# Supplementary material for: Identification and Validation of Necroptosis-Related LncRNA Signature in Hepatocellular Carcinoma for Prognosis Estimation and Microenvironment Status
Source: Front Genet. 2022 Jun 8;13:898507. doi: 10.3389/fgene.2022.898507 (PMC9214229; doi:10.3389/fgene.2022.898507)
Supplement: Supplementary file 1 [file Table2.XLSX]

## Sheet: Sheet1
Supplementary file 2: Differentially expressed NRGs
id	logFC	adj.P.Val
SLC39A7	1.14487	7.02e-28
TRAF2	0.989359	2.75e-24
CDKN2A	1.53411	6.23e-20
PLK1	1.19606	7.45e-20
HSPA4	0.763967	7.45e-20
TLR3	-0.6989	1.48e-19
AXL	-0.919546	1.82e-19
ID1	-1.79991	4.29e-18
TRIM11	0.580823	7.11e-15
SQSTM1	1.02965	7.43e-15
DNMT1	0.737136	2.36e-14
USP22	0.780059	3.44e-13
LEF1	0.742248	3.92e-11
IDH2	-0.731154	1.75e-09
KLF9	-0.854589	3.88e-07
MYC	-0.956189	4.21e-06
FAS	-0.523253	1.87e-05
MYCN	0.523717	3.88e-05
TERT	0.591838	9e-05
