# Supplementary material for: Identification and Validation of Necroptosis-Related LncRNA Signature in Hepatocellular Carcinoma for Prognosis Estimation and Microenvironment Status
Source: Front Genet. 2022 Jun 8;13:898507. doi: 10.3389/fgene.2022.898507 (PMC9214229; doi:10.3389/fgene.2022.898507)
Supplement: Supplementary file 2 [file Table3.XLS]

## Sheet: Supplementary file 2
Supplementary file 3: Differentially expressed genes in high and low-risk groups
id	logFC	adj.P.Val
SLC10A1	2.63226	7.85e-23
HAGH	1.02768	7.85e-23
IL27	1.09043	1.99e-20
ACSM2A	1.65892	1.99e-20
SLC27A5	1.90927	1.99e-20
HAAO	1.21985	1.56e-19
ACSM2B	1.5791	2.76e-19
GLYATL1	1.51708	9.33e-19
CYP8B1	2.52712	2.92e-18
SEC14L2	1.53053	3.59e-18
TTC36	1.87349	4.52e-18
PCK2	1.28502	1.54e-17
HSD17B6	1.85358	7.27e-17
CYP2C8	2.12157	7.95e-17
LDHD	1.19448	8.32e-17
ACSM5	1.62997	1.34e-16
CLEC3B	1.06048	1.43e-16
EHHADH	1.31845	2.63e-16
GYS2	1.60118	3.05e-16
RTP3	1.72147	1.29e-15
NR1I2	1.14659	1.46e-15
GLYAT	1.85969	1.87e-15
GADD45G	1.27027	1.91e-15
ADH1B	2.06885	1.91e-15
CYP2A6	2.95379	2.35e-15
RGN	1.16428	2.38e-15
DMGDH	1.1914	2.38e-15
CFHR4	1.53265	2.49e-15
BDH1	1.05616	3.94e-15
ADH1C	2.36385	6.05e-15
AR	1.06285	6.05e-15
ASPDH	1.52248	6.71e-15
HPR	1.80163	8.42e-15
LINC01018	1.67669	9.46e-15
PKM	-1.22783	1.38e-14
PFKFB1	1.19547	1.47e-14
CYP3A4	3.00868	1.98e-14
PCK1	2.04368	2.27e-14
PDK4	1.40339	2.63e-14
SLC22A1	2.27998	2.97e-14
RDH16	1.74765	3.82e-14
DCXR	1.29024	3.82e-14
PIPOX	1.22514	5.37e-14
G6PD	-1.08647	5.39e-14
DAO	1.23473	5.41e-14
ABAT	1.17192	5.49e-14
HAO1	1.42689	5.57e-14
TRNP1	-1.34744	7.72e-14
MYBL2	-1.17415	8.92e-14
CDO1	1.42575	1.05e-13
RORC	1.06779	1.05e-13
ALDH6A1	1.0752	1.08e-13
CA9	-1.50397	1.09e-13
UPB1	1.33668	1.09e-13
DNASE1L3	1.01137	1.11e-13
SELENBP1	1.05473	1.16e-13
TAT	2.29045	1.36e-13
AKR1C6P	1.05539	1.49e-13
CES2	1.29667	1.57e-13
ANXA10	1.23711	2.25e-13
SHMT1	1.04215	2.33e-13
SOX4	-1.02894	2.53e-13
EPS8L3	-1.16384	3.6e-13
CYP4F2	1.46567	3.83e-13
KLKB1	1.04854	4.53e-13
G6PC	1.62494	6.09e-13
SERPINC1	1.84559	8.05e-13
AP001783.1	1.5057	8.27e-13
LCAT	1.16935	1.04e-12
SPP2	1.84975	1.25e-12
KNG1	1.40332	2.29e-12
SORD	1.00816	2.37e-12
SLC51A	1.30855	2.44e-12
FETUB	1.70748	2.48e-12
C3P1	1.39772	2.56e-12
C8A	1.32254	2.97e-12
CYP4A22	1.31452	3e-12
SLC27A2	1.20586	3.47e-12
AGXT2	1.05681	4.19e-12
AFM	1.50917	4.52e-12
ABCB11	1.1626	4.66e-12
FNDC5	1.44221	5.39e-12
TMSB10	-1.20143	5.86e-12
CCND2P1	1.22088	5.96e-12
ABCB4	1.18619	6.95e-12
SLC38A4	1.25395	7.99e-12
UBE2C	-1.03731	1.39e-11
ETNPPL	1.37854	1.47e-11
C6	1.3793	1.49e-11
PON1	1.52698	1.68e-11
LINC01485	1.53377	1.78e-11
MOGAT2	1.19371	1.85e-11
MFSD2A	1.43313	1.93e-11
ABCG8	1.09077	2.45e-11
NAT2	1.08693	3.55e-11
GNMT	1.66116	3.58e-11
CYP2C9	1.67178	4.69e-11
APOA5	1.4753	4.83e-11
SLC2A2	1.30417	4.83e-11
CYP4A11	1.44412	5.01e-11
AQP9	1.81406	5.02e-11
FBP1	1.30429	5.94e-11
LINC01093	1.06192	6.49e-11
RBP5	1.1798	6.62e-11
FGGY	1.0635	7.05e-11
AKR1D1	1.44058	7.47e-11
ADH4	2.12873	8.32e-11
GBA3	1.17717	9.25e-11
HSD17B13	2.04445	1.01e-10
ANG	1.14744	1.1e-10
LINC00844	1.66382	1.1e-10
CFHR3	1.49354	1.1e-10
F12	1.28888	1.34e-10
SRD5A2	1.01214	1.47e-10
SPP1	-2.36566	1.75e-10
AGXT	1.42368	1.86e-10
AL354872.2	1.012	2.1e-10
DPYS	1.2858	2.16e-10
ETNK2	1.14951	2.17e-10
XDH	1.0142	2.17e-10
UGT2B10	1.56106	2.27e-10
SULT2A1	1.61249	2.46e-10
CD24	-1.60433	2.84e-10
AC021146.9	1.15877	3.13e-10
IGSF23	1.12105	3.48e-10
MASP2	1.28015	4.13e-10
LAMA5-AS1	1.01956	4.48e-10
CPN2	1.11264	5.1e-10
FABP4	1.08954	5.19e-10
GAL3ST1	-1.0848	5.55e-10
GBP7	1.14533	6.46e-10
PLG	1.27946	6.46e-10
CYP2B6	1.3223	7.96e-10
UGT2B15	1.58733	8.71e-10
F13B	1.12033	9.06e-10
A1BG	1.09844	9.24e-10
IER3	-1.0271	9.45e-10
GPD1	1.12238	1.01e-09
SLC6A1	1.0581	1.18e-09
SLC46A3	1.02879	1.19e-09
GSTA1	1.74198	1.24e-09
PYCR1	-1.0907	1.64e-09
CTH	1.21283	1.75e-09
HAO2	1.53541	1.75e-09
AKR7A3	1.31041	1.99e-09
C8B	1.02018	2.38e-09
F9	1.50782	2.5e-09
FMO3	1.31167	3.38e-09
ACOT12	1.01128	3.84e-09
AZGP1	1.14515	3.85e-09
NR1I3	1.0946	4.13e-09
ALDOB	1.62588	4.28e-09
HPX	1.2309	4.28e-09
ADH1A	1.39074	4.84e-09
TTR	1.45835	5.53e-09
CYP7A1	1.51103	7.52e-09
OTC	1.35359	7.74e-09
HMGCS2	1.18768	7.82e-09
CYP2A7	1.55722	7.82e-09
HRG	1.7562	8.89e-09
INSIG1	1.07198	1.07e-08
CCL16	1.32558	1.45e-08
LINC01702	1.19125	1.79e-08
APOC3	1.40698	1.82e-08
HJV	1.25019	1.97e-08
BHMT	1.53145	2.2e-08
RNU1-70P	1.16661	2.9e-08
RAMP1	1.08454	3.97e-08
S100A11	-1.01488	4.41e-08
GSTA2	1.75119	5.34e-08
CYP2B7P	1.32824	5.8e-08
FTCD	1.11973	9.85e-08
SLC28A1	1.02888	1.07e-07
HP	1.4082	1.31e-07
ITIH1	1.00157	1.53e-07
THRSP	1.64715	1.58e-07
HPD	1.78712	2.69e-07
UGT2B7	1.23178	2.79e-07
LINC01554	1.41608	3.27e-07
CFHR5	1.35813	3.84e-07
GCGR	1.13682	4.5e-07
SLCO1B1	1.02902	5.01e-07
SDS	1.77122	5.35e-07
TESC	-1.08426	6.16e-07
APOF	1.18509	7.31e-07
HSD11B1	1.64709	9.59e-07
SLC13A5	1.06028	1.11e-06
ALDH1L1	1.12279	1.35e-06
CPS1	1.4818	1.69e-06
CCL20	-1.16521	1.86e-06
SLC22A7	1.29671	1.87e-06
AFP	-1.72392	3.61e-06
C7	1.07656	5.45e-06
UGT1A4	1.18014	1.03e-05
LECT2	1.10482	1.24e-05
CYP1A2	1.24589	1.34e-05
SLC25A47	1.35504	1.55e-05
CFHR1	1.12032	1.81e-05
SAA4	1.06149	2.51e-05
S100P	-1.34812	2.68e-05
NTS	-1.05394	9.64e-05
PEG10	-1.195	0.000128525
SAA1	1.44584	0.000487865
SPINK1	-1.42519	0.000591432
H19	-1.1067	0.00387195
SAA2	1.04511	0.00417573
