# Supplementary material for: Identification and Validation of Necroptosis-Related LncRNA Signature in Hepatocellular Carcinoma for Prognosis Estimation and Microenvironment Status
Source: Front Genet. 2022 Jun 8;13:898507. doi: 10.3389/fgene.2022.898507 (PMC9214229; doi:10.3389/fgene.2022.898507)
Supplement: Supplementary file 3 [file Table4.XLSX]

## Sheet: Sheet1
Genes in different signatures
Autophagy Signature	Glycosyltransferase Signature	Mutant Gene Signature	Pyroptosis Signature	Necroptosis Signature
ATIC	POMGNT1	MAP2	CASP6	HCG27
BAX	DPM1	DYNC1H1	GPX4	C2orf27A
BIRC5	B4GALT3	CPS1	GSDMD	BACE1-AS
CAPNS1	B4GALT2	PTPRB	NOD2	SNHG4
FKBP1A	B4GALNT1	MKI67	PRKACA	MIR210HG
	B3GAT3		PLCG1	SNHG3
			WNK1	HCG11
